# Supplementary material for: Ionic liquid nanostructure enables alcohol self assembly
Source: Royal Society of Chemistry journal article supplement (doi:10.1039/c6cp01739h), 2016-01-01
Supplement: c6cp01739h1.pdf [file c6cp01739h1.pdf]

# Ionic Liquid Nanostructure Enables Alcohol Self Assembly –

## Supporting information

Thomas Murphy <sup>a</sup>, Robert Hayes <sup>a</sup>, Silvia Imberti <sup>b</sup>, Gregory G. Warr <sup>c</sup> and Rob Atkin<sup>\*,a</sup>

<sup>a</sup>Priority Research Centre for Advanced Fluids and Interfaces, Newcastle Institute for Energy  
& Resources, University of Newcastle, Callaghan, NSW 2308, Australia

<sup>b</sup>STFC, Rutherford Appleton Laboratory, Didcot, UK

<sup>c</sup>School of Chemistry, The University of Sydney, NSW 2006, Australia

\*E-mail: [rob.atkin@newcastle.edu.au](mailto:rob.atkin@newcastle.edu.au)

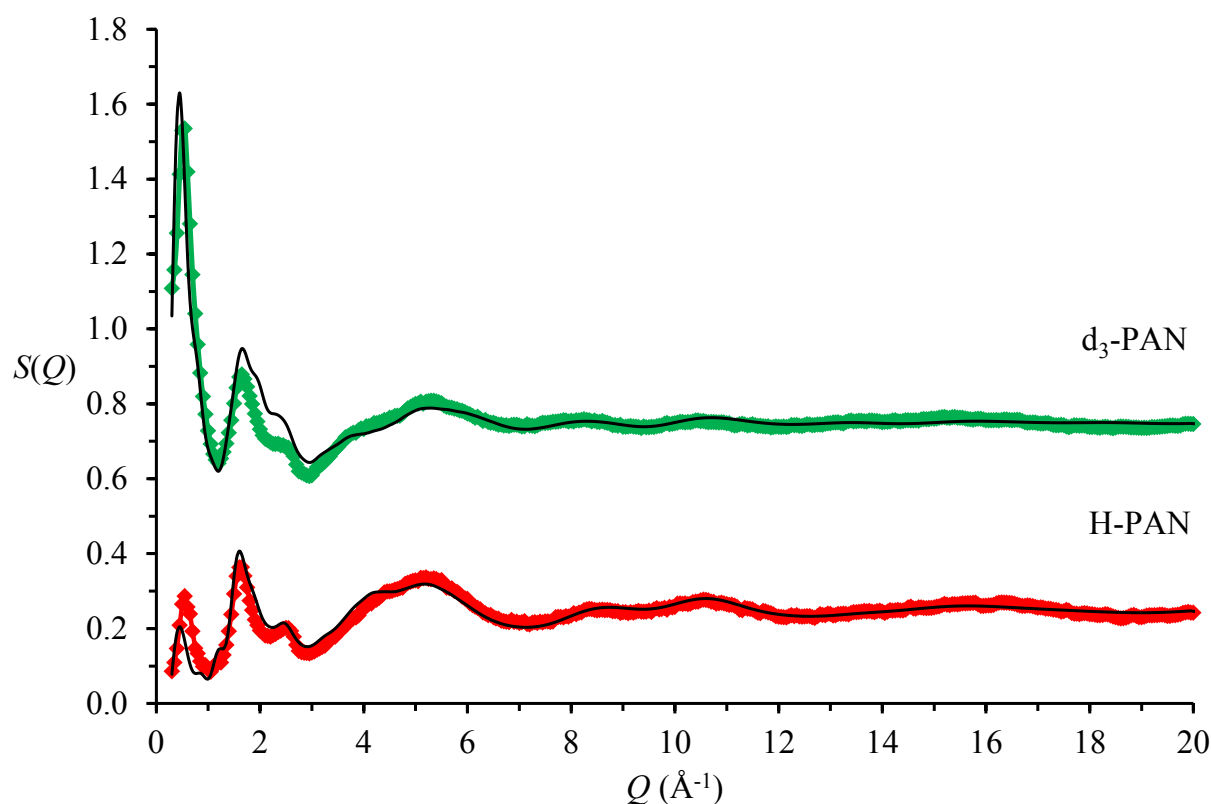

**Figure S1.** Measured (coloured diamonds) and EPSR fits (black lines) for pure propylammonium nitrate, PAN
